# Supplementary material
Source: publisher figshare collection journal article supplement (https://frontiersin.figshare.com/ndownloader/files/24384311)
Supplement: Supplementary file 1 [file 24384311]

**Table S1.** Effects of climate, fire, and thinning treatments on median basal area (m2/ha) within vegetation zones. Scenarios include historical climate with fire and without thinning (Hist No Thin) for reference against climate ensemble projections (Ens), with and without fire, and without thinning, single-entry thinning (Thin 1x) and double-entry thinning (Thin 2x).

|  | |  |  | Year | | | | |
| --- | --- | --- | --- | --- | --- | --- | --- | --- |
|  | |  |  | 10 | 20 | 30 | 40 | 50 |
| With Fire |  | Hist No Thin | Riparian | 43 | 28 | 36 | 25 | 22 |
| Forest | 22 | 23 | 23 | 29 | 24 |
| Woodland | 32 | 26 | 22 | 22 | 19 |
| Shrub | 8 | 7 | 7 | 6 | 3 |
| No Fire | | Ens No Thin | Riparian | 46 | 23 | 10 | 5 | 5 |
| Forest | 31 | 33 | 32 | 29 | 27 |
| Woodland | 34 | 14 | 4 | 4 | 4 |
| Shrub | 17 | 8 | 3 | 3 | 3 |
| Ens Thin 1x | Riparian | 46 | 23 | 10 | 6 | 5 |
| Forest | 31 | 33 | 33 | 29 | 26 |
| Woodland | 34 | 15 | 4 | 4 | 4 |
| Shrub | 17 | 8 | 3 | 3 | 3 |
| Ens Thin 2x | Riparian | 46 | 24 | 16 | 6 | 5 |
| Forest | 31 | 33 | 33 | 28 | 26 |
| Woodland | 34 | 15 | 8 | 4 | 4 |
| Shrub | 17 | 8 | 4 | 3 | 3 |
| With Fire | | Ens No Thin | Riparian | 43 | 22 | 10 | 6 | 5 |
| Forest | 28 | 23 | 21 | 18 | 17 |
| Woodland | 32 | 14 | 4 | 4 | 4 |
| Shrub | 13 | 6 | 3 | 3 | 3 |
| Ens Thin 1x | Riparian | 44 | 22 | 9 | 6 | 5 |
| Forest | 25 | 24 | 21 | 18 | 17 |
| Woodland | 31 | 14 | 4 | 4 | 4 |
| Shrub | 14 | 6 | 3 | 3 | 3 |
| Ens Thin 2x | Riparian | 41 | 19 | 6 | 5 | 4 |
| Forest | 21 | 22 | 19 | 17 | 12 |
| Woodland | 30 | 13 | 4 | 4 | 0 |
| Shrub | 11 | 5 | 3 | 3 | 3 |
